# Supplementary material for: Technical note: Towards a stronger observational support for haze pollution control by interpreting carbonaceous aerosol results derived from different measurement approaches
Source: Copernicus journal article supplement (doi:10.5194/acp-25-8493-2025), 2025-08-05
Supplement: Supplementary file 1 [file acp-25-8493-2025-supplement.pdf]

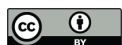

*Supplement of*

**Technical note: Towards a stronger observational support for haze pollution control by interpreting carbonaceous aerosol results derived from different measurement approaches**

**Yuan Cheng et al.**

*Correspondence to:* Jiu-meng Liu (jiumengliu@hit.edu.cn)

The copyright of individual parts of the supplement might differ from the article licence.

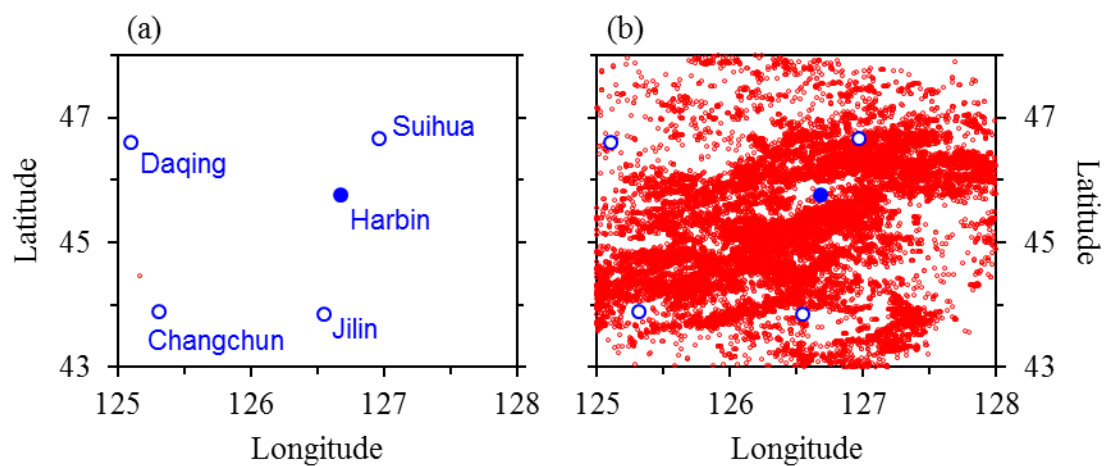

**Figure S1.** Fire hotspots (red circles) detected during the **(a)** winter and **(b)** spring campaigns by the joint NASA–NOAA Suomi National Polarorbiting Partnership (S-NPP) satellite. The locations of Harbin and several nearby cities are shown by the blue circles.

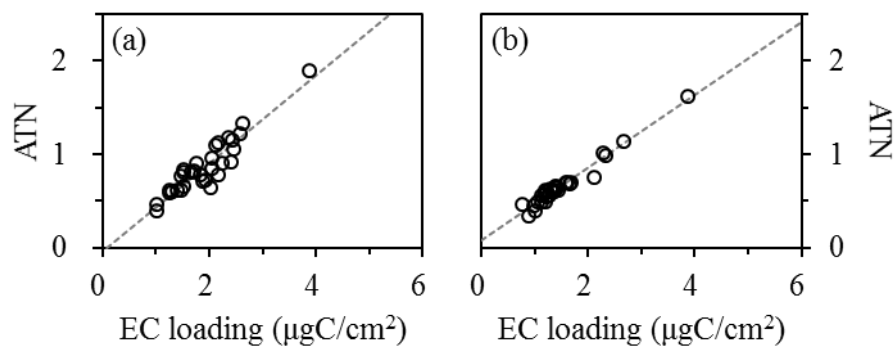

**Figure S2.** Relationships between ATN and EC loading, i.e., EC<sub>s</sub>, for the (a) untreated and (b) extracted LV filters collected in winter. The temperature protocol used was IMPROVE-A. Linear dependence was identified for the whole EC<sub>s</sub> range, regardless of the pretreatment approach (i.e., with or without methanol extraction). As indicated by the dashed lines in (a) and (b), the regression slopes were  $47.1 \pm 3.6$  (with a close-to-zero intercept;  $r = 0.93$ ) and  $39.0 \pm 1.4$  (with a close-to-zero intercept;  $r = 0.98$ ) m<sup>2</sup>/gC for the untreated and extracted filters, respectively.

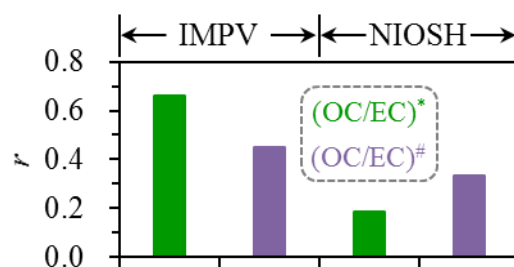

**Figure S3.** Comparison of  $r$  values derived from the linear regressions of various OC/EC estimations on SNA/CO, based on the wintertime LV samples. IMPV indicates the IMPROVE-A temperature protocol. A total of four sets of OC/EC ratios were determined using different protocols and pre-treatment approaches. The OC/EC ratio measured by the untreated samples using IMPROVE-A, i.e., the IMPV-based (OC/EC)\*, exhibited the strongest association with SNA/CO.

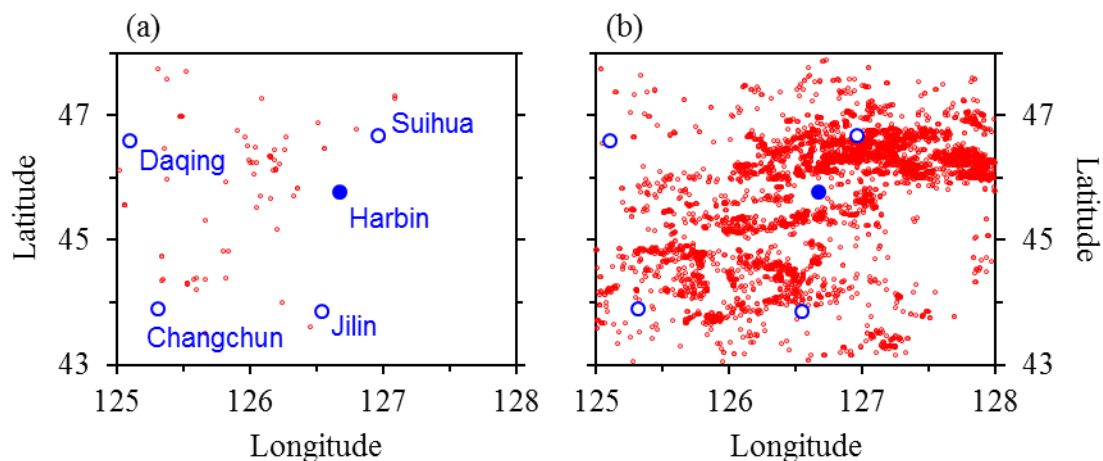

**Figure S4.** Fire hotspots (red circles) detected during two representative segments of the 2021 spring campaign, i.e., (a) 09:00 on April 27 to 16:00 on April 28, and (b) 21:00 on April 20 to 09:00 on April 22. Each period corresponded to three HV samples. The locations of Harbin and several nearby cities are shown by the blue circles. The period of (a) was characterized by sparse fire hotspots around Harbin, together with relatively low levels of  $LG/K^+$  (below 1) and  $f_{LG}$  (below 1.5%). For the period of (b), the fire hotspots were much more intensive, accompanied with substantially increases in both  $LG/K^+$  (reaching 1.7–3.3) and  $f_{LG}$  (reaching 5.3–6.5%). The contrast between fire hotspots detected during the periods of (a) and (b) provided clear evidence for the associations between agricultural fires and the two ratios. In addition, comparison of the spring and winter results suggested that a  $LG/K^+$  ratio of  $\sim 0.5$  was characteristic of household burning of biofuels, whereas the ratio could be effectively enhanced by agricultural fires. Here we used a threshold  $LG/K^+$  of 1 to distinguish the events with considerable and insignificant impacts of agricultural fires. We also found that a common feature for the events with  $LG/K^+$  above 1 was that the  $f_{LG}$  levels stayed above 1.8%, indicating a threshold  $LG/K^+$  of 1 could be translated into a threshold  $f_{LG}$  of 1.8%. Finally,  $f_{LG}$  levels above 1.8% were used to identify the fire-impacted samples.

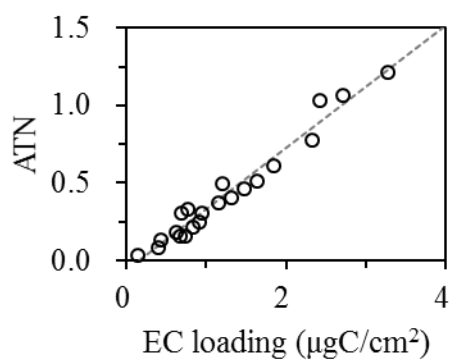

**Figure S5.** Relationship between ATN and EC loading, i.e.,  $\text{EC}_s$ , for the untreated LV filters collected in spring. The temperature protocol used was IMPROVE-A. As indicated by the dashed line, a linear dependence was identified for the whole  $\text{EC}_s$  range. The regression slope was  $39.6 \pm 1.8 \text{ m}^2/\text{gC}$ , with a close-to-zero intercept ( $r = 0.98$ ).

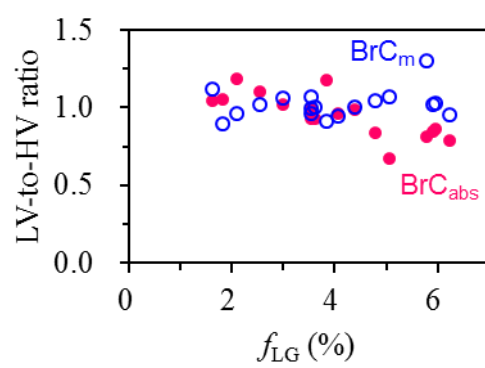

**Figure S6.** Dependences of the LV-to-HV ratios of BrC mass ( $BrC_m$ ) and absorption ( $BrC_{abs}$ ) on  $f_{LG}$  in spring.
